# Supplementary material for: Synthetic BiOBr/Bi2S3/CdS Crystalline Material and Its Degradation of Dye under Visible Light
Source: MDPI journal article supplement (doi:10.3390/cryst11080899), 2021-07-31
Supplement: s1 [file s1]

# Synthetic BiOBr/Bi<sub>2</sub>S<sub>3</sub>/CdS Crystalline Material and Its Degradation of Dye under Visible Light

Yunhan Jin <sup>1</sup>, Zhe Xing <sup>1,2</sup>, Yinhui Li <sup>1</sup>, Jian Han <sup>1</sup>, Heike Lorenz <sup>3</sup> and Jianxin Chen <sup>1,4,\*</sup>

<sup>1</sup> School of Chemical Engineering and Technology, Hebei University of Technology, Tianjin 300130, China; q724778596@126.com (Y.J.); xingzhe1995@126.com (Z.X.); liyinhui@hebut.edu.cn (Y.L.); superhj@hebut.edu.cn (J.H.)

<sup>2</sup> CenerTech Tianjin Chemical Research and Design Institute Co., Ltd., Tianjin 300131, China

<sup>3</sup> Max Planck Institute for Dynamics of Complex Technical Systems, D-39106 Magdeburg, Germany; lorenz@mpi-magdeburg.mpg.de

<sup>4</sup> National-Local Joint Engineering Laboratory for Energy Conservation in Chemical Process Integration and Resources Utilization, Hebei University of Technology, Tianjin 300130, China

\* Correspondence: chjx2000@126.com

## Materials and Instruments

The chemicals involved were of analytical grade. Anhydrous ethanol (EtOH, C<sub>2</sub>H<sub>6</sub>O), ethylene glycol (EG, C<sub>2</sub>H<sub>6</sub>O<sub>2</sub>), tert-butanol (TBA, C<sub>4</sub>H<sub>10</sub>O), potassium bromide (KBr) and potassium bromate (PB, KBrO<sub>3</sub>) were purchased at Tianjin Chemical Reagent Sixth Factory. Bismuth nitrate (Bi(NO<sub>3</sub>)<sub>3</sub>•5H<sub>2</sub>O), p-benzoquinone (p-BQ, C<sub>6</sub>H<sub>4</sub>O<sub>2</sub>), thioacetamide (TAA, C<sub>2</sub>H<sub>5</sub>NS) and 5,5-dimethyl-1-pyrroline-N-oxide (DMPO, C<sub>6</sub>H<sub>11</sub>NO), were purchased from Shanghai Aladdin Biochemical Technology Co., Ltd. Cadmium chloride (CdCl<sub>2</sub>) was purchased from Tianjin Damao Chemical Reagent Factory. Ammonium oxalate (AO, (NH<sub>4</sub>)<sub>2</sub>C<sub>2</sub>O<sub>4</sub>•H<sub>2</sub>O) was purchased from Shanghai Macleans Biochemical Technology Co., Ltd. Methylene blue (MeB, C<sub>16</sub>H<sub>18</sub>ClN<sub>3</sub>S) was purchased at Tianjin Guangfu Fine Chemical Research Institute.

The analytical instruments included UV762 (Shanghai Youke Instrument) ultraviolet/visible spectrophotometer (UV/Vis), Bruker Vertex 70 Fourier transform infrared spectrometer (FT-IR), Bruker D8 Discover X-ray powder diffractometer (XRD), Nano-SEM450LV Scanning electron microscopy (SEM), Octane Plus (EDAX, USA) X-ray energy spectrometer (EDS), ESCALAB 250Xi (Thermo Fisher Scientific, USA) X-ray photoelectron spectroscopy (XPS), U3900H (Hitachi, Japan) UV-Visible Diffuse Reflectance Spectrometer (DRS) and A300 (Bruker, Germany) electron paramagnetic resonance spectrometer (EPR).

## Preparation of BiOBr Microspheres

BiOBr microspheres were prepared by a conventional solvothermal method[1]. In simple terms, 970.1 mg Bi(NO<sub>3</sub>)<sub>3</sub>•5H<sub>2</sub>O was dispersed in 60 mL of ethylene glycol solution and stirred for 0.5 h until the solution was clear. Subsequently, 238 mg KBr was added to the above solution, and stirring was continued for 1 hour until the mixture was uniform. Next, the formed solution was transferred to a 100 mL Teflon reactor, and the reactor was placed at 140 °C over for 12 h. After the reaction, the white product was collected by centrifugation (5000 r/min), washed with deionized water and ethanol repeatedly and dried overnight in a vacuum drying oven at 60 °C.

## Preparation of BiOBr/Bi<sub>2</sub>S<sub>3</sub>/CdS Composite

The preparation of BiOBr/Bi<sub>2</sub>S<sub>3</sub>/CdS ternary composites was mainly composed of precursor preparation and vulcanization[2]. First, 304.9 mg of synthetic BiOBr microspheres were dispersed in 40 mL of ethanol solution, and the ultrasound was continued for 0.5 h until the solution had no obvious precipitation. Then, 183.3 mg of CdCl<sub>2</sub> was added to the above solution and the ultrasonic treatment was maintained for 1 hour. After the treatment, transfer to magnetic stirring was arranged and continued at room temperature for

2 h. Then, 100 mg TAA was added to the mixed solution, and after stirring for 1 h, the solution was transferred to a 100 mL Teflon autoclave. After the reaction kettle was continuously heated at 160°C for 6 h, the product was collected by centrifugation, washed with deionized water and ethanol several times, and the final product was obtained in a vacuum drying oven at 60°C overnight. For comparison, pure Bi<sub>2</sub>S<sub>3</sub> and CdS were developed following the same routine without the addition of BiOBr.

## References

1. Xing, H. M.; Ma, H. C.; Fu, Y. H.; Zhang, X. X.; Dong, X. L.; Zhang, X. F., Preparation of BiOBr by solvothermal routes with different solvents and their photocatalytic activity. *J. Renew. Sustain. Energy* **2015**, *7* (6), 10.
2. Fang, Y. J.; Luan, D. Y.; Chen, Y.; Gao, S. Y.; Lou, X. W., Synthesis of Copper-Substituted CoS<sub>2</sub>@Cu<sub>x</sub>S Double-Shelled Nanoboxes by Sequential Ion Exchange for Efficient Sodium Storage. *Angew. Chem.-Int. Edit.* **2020**, *59* (7), 2644-2648.
