# Supplementary material for: Synthetic BiOBr/Bi2S3/CdS Crystalline Material and Its Degradation of Dye under Visible Light
Source: MDPI journal article supplement (doi:10.3390/cryst11080899), 2021-07-31
Supplement: s1 [file s1]

Archive with 1 entries (1 files):
- crystals-1307482-supplementary.pdf
